# Supplementary material
Source: publisher figshare collection journal article supplement (https://brill.figshare.com/articles/dataset/_/26715736)
Supplement: Supplementary file 1 [file 1]

# Probiotics/prebiotics/synbiotics and human neuropsychiatric outcomes: an umbrella review

Q. Du, Q. Li, C. Liu, G. Liao, J. Li, J. Yang, Q. Zhang, X. Gong and K. Li

**Table S1.** The search strategies.

## (A). Probiotics related search strategies.

| Database       | Search Strategies                                                                                                                                                                                                                                                                                                                                                                                                                                                                                                                                                                                      |
|----------------|--------------------------------------------------------------------------------------------------------------------------------------------------------------------------------------------------------------------------------------------------------------------------------------------------------------------------------------------------------------------------------------------------------------------------------------------------------------------------------------------------------------------------------------------------------------------------------------------------------|
| PubMed         | <p>#1 Search: " Probiotics "[Mesh] Sort by: Most Recent</p> <p>#2 Search: " Systematic review "[Mesh] Sort by: Most Recent</p> <p>#3 Search: " Meta-analysis "[Mesh] Sort by: Most Recent</p> <p>#4 Search: "<i>Lactobacillus</i>"[Title/Abstract] OR "<i>Bifidobacterium</i>"[Title/Abstract] OR "<i>Streptococcus thermophilus</i>"[Title/Abstract] OR "<i>Clostridium butyricum</i>"[Title/Abstract] OR "<i>Lactobacillus rhamnosus</i>"[Title/Abstract] OR "<i>Bifidobacterium animalis</i>"[Title/Abstract]</p> <p>#5 Search: #1 or #4</p> <p>#6 Search: #2 or #3</p> <p>#7 Search: #5 and #6</p> |
| Embase         | <p>1 ' Probiotics '/exp</p> <p>2 ' Systematic review '/exp</p> <p>3 ' Meta-analysis '/exp</p> <p>4 '<i>Lactobacillus</i>': ab,ti OR '<i>Bifidobacterium</i>':ab,ti OR '<i>Streptococcus thermophilus</i>':ab,ti OR '<i>Clostridium butyricum</i>':ab,ti OR '<i>Lactobacillus rhamnosus</i>':ab,ti OR '<i>Bifidobacterium animalis</i>':ab,ti</p> <p>5 #1 OR #4</p> <p>6 #2 OR #3</p> <p>7 #5 AND #6</p>                                                                                                                                                                                                |
| Web of Science | <p>1 TS=(Probiotics) OR TS=(<i>Lactobacillus</i>) OR TS=(<i>Bifidobacterium</i>) OR TS= (<i>Streptococcus thermophilus</i>) OR TS= (<i>Clostridium butyricum</i>) OR</p>                                                                                                                                                                                                                                                                                                                                                                                                                               |

TS=( *Lactobacillus rhamnosus*) OR TS=( *Bifidobacterium animalis*)

2 TS= (Systematic review) OR TS=(Meta-analysis)

3 #1 and #2

---

**(B). Prebiotics related search strategies.**

| Database       | Search Strategies                                                                                                                                                                                                                                                                                                                                                                                       |
|----------------|---------------------------------------------------------------------------------------------------------------------------------------------------------------------------------------------------------------------------------------------------------------------------------------------------------------------------------------------------------------------------------------------------------|
| PubMed         | #1 Search: " Prebiotics "[Mesh] Sort by: Most Recent<br>#2 Search: " Systematic review "[Mesh] Sort by: Most Recent<br>#3 Search: " Meta-analysis "[Mesh] Sort by: Most Recent<br>#4 Search: " Lactulose "[Title/Abstract] OR " Inulin "[Title/Abstract]<br>OR " Galactose "[Title/Abstract] OR " Oligofructose "[Title/Abstract]<br>#5 Search: #1 or #4<br>#6 Search: #2 or #3<br>#7 Search: #5 and #6 |
| Embase         | 1 ' Prebiotics '/exp<br>2 ' Systematic review '/exp<br>3 ' Meta-analysis '/exp<br>4 'Lactulose': ab,ti OR 'Inulin':ab,ti OR 'Galactose':ab,ti OR<br>'Oligofructose': ab,ti<br>5 #1 OR #4<br>6 #2 OR #3<br>7 #5 AND #6                                                                                                                                                                                   |
| Web of Science | 1 TS=(Prebiotics) OR TS=(Lactulose) OR TS=(Inulin) OR TS=<br>(Galactose) OR TS=(Oligofructose)<br>2 TS= (Systematic review) OR TS=(Meta-analysis)<br>3 #1 and #2                                                                                                                                                                                                                                        |

---

**(C). Synbiotics related search strategies.**

| Database | Search Strategies                                                                                                                                                              |
|----------|--------------------------------------------------------------------------------------------------------------------------------------------------------------------------------|
| PubMed   | #1 Search: " Synbiotics "[Mesh] Sort by: Most Recent<br>#2 Search: " Systematic review "[Mesh] Sort by: Most Recent<br>#3 Search: " Meta-analysis "[Mesh] Sort by: Most Recent |

---

|         |                                                 |
|---------|-------------------------------------------------|
|         | #4 Search: #2 or #3                             |
|         | #5 Search: #1 and #4                            |
| Embase  | 1 ' Synbiotics '/exp                            |
|         | 2 ' Systematic review '/exp                     |
|         | 3 ' Meta-analysis '/exp                         |
|         | 4 #2 OR #3                                      |
|         | 5 #1 AND #4                                     |
| Web of  | 1 TS=(Synbiotics)                               |
| Science | 2 TS= (Systematic review) OR TS=(Meta-analysis) |
|         | 3 #1 and #2                                     |

---

Table S2. Associations between probiotics, prebiotics, or synbiotics consumption and neuropsychiatric outcomes.

| Outcomes                                             | First author, year of publication | Populations                 | Type and dose of intervention                             | Duration of intervention or follow-up | Outcome comparison                                   | No. of studies in MA | Study design | No. of intervention or observation/total | Effects mode | Metric of MA | Estimated summary effect (95% CI) | I <sup>2</sup> % | Publication biases              |
|------------------------------------------------------|-----------------------------------|-----------------------------|-----------------------------------------------------------|---------------------------------------|------------------------------------------------------|----------------------|--------------|------------------------------------------|--------------|--------------|-----------------------------------|------------------|---------------------------------|
| Neuropsychological test outcomes                     |                                   |                             |                                                           |                                       |                                                      |                      |              |                                          |              |              |                                   |                  |                                 |
| Risk of no improvement in neuropsychological tests   | Luo, M. 2011 <sup>[1]</sup>       | Patients with MHE           | lactulose, NR                                             | 2-24 weeks                            | Lactulose versus no treatment / placebo              | 9                    | RCT          | 228/434                                  | Fixed        | RR           | 0.52 (0.44 to 0.62)               | 0                | No significant publication bias |
| The mean number of abnormal neuropsychological tests | Luo, M. 2011 <sup>[1]</sup>       | Patients with MHE           | lactulose, NR                                             | 2-24 weeks                            | Lactulose versus no treatment / placebo              | 4                    | RCT          | 107/203                                  | Fixed        | MD           | -1.76 (-1.96 to -1.56)            | 34               | NR                              |
| Results of psychometric testing                      | Zucker, D.M. 2019 <sup>[2]</sup>  | Patients with MHE           | lactulose, 30–60 ml in two to three divided doses per day | Mean 1-3 months                       | Lactulose versus usual care/ l-ornithine-l-aspartate | 2                    | RCT          | 63/130                                   | Fixed        | SM D         | -0.99 (-1.38 to -0.61)            | 95               | NR                              |
| Number connection test                               | Cao, Q. 2018 <sup>[8]</sup>       | Cirrhotic patients with MHE | Probiotic, 1*10 <sup>9</sup> -1.1*10 <sup>11</sup> CFU/d  | 4 weeks                               | Probiotic versus placebo/no treatment                | 2                    | RCT          | 54/104                                   | Random       | MD           | -30.25 (-49.85 to -10.66)         | 55               | NR                              |
| SIP(psychosocial dimension)                          | Zhao, L.-N. 2015 <sup>[20]</sup>  | Patients with MHE or OHE    | Probiotic, NR                                             | 8-12 weeks                            | Probiotic versus placebo/no treatment                | 2                    | RCT          | 48/95                                    | Fixed        | MD           | -3.50 (-4.91 to -2.08)            | 0                | NR                              |

|                                 |                                           |                                                                |                                                        |                     |                                              |   |                  |         |        |    |                        |      |                                 |
|---------------------------------|-------------------------------------------|----------------------------------------------------------------|--------------------------------------------------------|---------------------|----------------------------------------------|---|------------------|---------|--------|----|------------------------|------|---------------------------------|
| SIP(psychosocial dimension)     | Dalal, R. 2017 <sup>[22]</sup>            | Patients with HE                                               | Probiotic, no uniform standard                         | 8 weeks to 3 months | Probiotic versus placebo/no treatment        | 2 | RCT              | 48/95   | Random | MD | -3.54 (-4.95 to -2.12) | 0    | NR                              |
| Hepatic encephalopathy outcomes |                                           |                                                                |                                                        |                     |                                              |   |                  |         |        |    |                        |      |                                 |
| Reversal of MHE                 | Viramontes Hörner, D. 2017 <sup>[6]</sup> | Adult (18 years old or older) patients with hepatic cirrhosis. | Probiotic, 3*10 <sup>6</sup> -5*10 <sup>13</sup> CFU/d | 1-6 months          | Probiotic versus placebo/no treatment        | 9 | RCT              | 262/570 | Random | RR | 1.53 (1.14 to 2.05)    | 59   | NR                              |
| Improvement in MHE              | Cao, Q. 2018 <sup>[8]</sup>               | Cirrhotic patients with MHE                                    | Probiotic, 3*10 <sup>6</sup> CFU/d                     | 4 weeks             | Probiotic versus placebo/no treatment        | 2 | RCT              | 26/33   | Random | OR | 0.18 (0.07 to 0.47)    | 0    | No significant publication bias |
| Improvement in MHE              | Saab, S. 2016 <sup>[21]</sup>             | Patients with HE                                               | Probiotic, no uniform standard                         | 1-6 months          | Probiotic versus placebo/no treatment        | 7 | Cohort study/RCT | 174/352 | Fixed  | OR | 3.91 (2.25 to 6.80)    | 33   | NR                              |
| Risk of no improvement of MHE   | Shukla, S. 2011 <sup>[32]</sup>           | Patients with MHE or SHE                                       | Probiotic/prebiotic/synbiotic, no uniform standard     | 2-24 weeks          | Probiotic/prebiotic/synbiotic versus placebo | 9 | RCT              | 422/698 | Fixed  | RR | 0.40 (0.32 to 0.50)    | 21.7 | No significant publication bias |
| Risk of no improvement of MHE   | Shukla, S. 2011 <sup>[32]</sup>           | Patients with MHE or SHE                                       | Lactulose, NR                                          | 2-24 weeks          | Lactulose versus placebo                     | 5 | RCT              | 204/340 | Fixed  | RR | 0.34 (0.24 to 0.47)    | 34.5 | No significant publication bias |
| Improvement in HE               | Holte, K. 2012 <sup>[18]</sup>            | Patients with HE                                               | Probiotic, no uniform standard                         | 10 d-16 weeks       | Probiotics/synbiotics versus placebo         | 6 | RCT              | 171/333 | Random | RR | 1.40 (1.05 to 1.86)    | 5    | NR                              |

[illegible]

|                |                                  |                                                                           |                                                       |             |                                                                                                                                 |   |                                   |         |        |      |                      |      |        |
|----------------|----------------------------------|---------------------------------------------------------------------------|-------------------------------------------------------|-------------|---------------------------------------------------------------------------------------------------------------------------------|---|-----------------------------------|---------|--------|------|----------------------|------|--------|
| MMSE score     | Meng, H.Y.H. 2022 <sup>[3]</sup> | Age-related dementia                                                      | Probiotic, $4 \times 10^8$ - $5 \times 10^{10}$ CFU/d | 12-28 weeks | Probiotic versus placebo                                                                                                        | 5 | RCT/ open-label, single-arm study | 161/316 | Random | MD   | 0.92 (-0.05 to 1.89) | 94.8 | 0.1671 |
| MMSE score     | Zhu, G. 2021 <sup>[12]</sup>     | Individuals diagnosed with Alzheimer disease or mild cognitive impairment | Probiotic, no uniform standard                        | 12 weeks    | Probiotic/ synbiotics versus usual care/placebo/ other interventions without any probiotics/prebiotic/symbiotic supplementation | 4 | RCT                               | 116/230 | Random | SM D | 0.59 (-0.44 to 1.63) | 93   | NR     |
| MMSE score     | Li, X. 2021 <sup>[13]</sup>      | Patients with mild cognitive impairment and Alzheimer disease             | Probiotic, NR                                         | 12 weeks    | Probiotic versus no probiotic interventions                                                                                     | 3 | RCT                               | 118/234 | Random | WM D | 1.08 (-0.34 to 2.50) | 92.6 | NR     |
| Non-MMSE score | Den, H. 2020 <sup>[33]</sup>     | Adults with Alzheimer's disease or mild cognitive impairment              | Probiotic, $3 \times 10^9$ - $1 \times 10^{10}$ CFU/d | 12 weeks    | Probiotic versus placebo                                                                                                        | 2 | RCT                               | NR/140  | Fixed  | SM D | 0.16 (-0.17 to 0.50) | 0    | 0.54   |

|                    |                                   |                                                              |                                                        |              |                                                                                                                               |    |                    |         |        |           |                         |    |       |
|--------------------|-----------------------------------|--------------------------------------------------------------|--------------------------------------------------------|--------------|-------------------------------------------------------------------------------------------------------------------------------|----|--------------------|---------|--------|-----------|-------------------------|----|-------|
| Global cognition   | Marx, W. 2020 <sup>[4]</sup>      | No restrictions                                              | Probiotic, Total Dose: 6 million CFU - 900 billion CFU | 4-12 weeks   | Probiotic versus placebo                                                                                                      | 11 | RCT/<br>Cross-over | 285/562 | Random | Hedges' g | 0.115 (-0.041 to 0.270) | 0  | > 0.1 |
| Global cognition   | Marx, W. 2020 <sup>[4]</sup>      | No restrictions                                              | Prebiotic, 3.375-10 g/d                                | 2 h-24 weeks | Prebiotic versus placebo                                                                                                      | 5  | RCT/<br>Cross-over | 274/324 | Random | Hedges' g | 0.077 (-0.091 to 0.246) | 0  | > 0.1 |
| Global cognition   | Lv, T. 2021 <sup>[34]</sup>       | Healthy individuals or individuals with cognitive impairment | Probiotic, NR                                          | 8-12 weeks   | Probiotic versus no probiotic interventions                                                                                   | 4  | RCT                | 93/182  | Random | MD        | 0.17 (-0.12 to 0.46)    | 0  | NR    |
| Cognitive function | Zhu, G. 2021 <sup>[12]</sup>      | Individuals diagnosed with Alzheimer disease                 | Probiotic, no uniform standard                         | 12 weeks     | Probiotic/synbiotics versus usual care/placebo/other interventions without any probiotics/prebiotic/synbiotic supplementation | 4  | RCT                | 114/234 | Random | MD        | 0.34 (-0.66 to 1.34)    | 93 | 0.205 |
| Cognitive function | Krüger, J.F. 2021 <sup>[16]</sup> | Individuals with Alzheimer's                                 | Probiotic, no uniform standard                         | 12 weeks     | Probiotic versus placebo                                                                                                      | 3  | RCT                | 82/161  | Random | MD        | 0.56 (-0.06 to 1.18)    | 73 | NR    |



|                              |                                     |                     |                                          |             |                                                                 |   |                 |          |        |           |                            |        |                                 |
|------------------------------|-------------------------------------|---------------------|------------------------------------------|-------------|-----------------------------------------------------------------|---|-----------------|----------|--------|-----------|----------------------------|--------|---------------------------------|
|                              |                                     | disease             |                                          |             |                                                                 |   |                 |          |        |           |                            |        |                                 |
| Cognitive function           | Lv, T. 2021 <sup>[34]</sup>         | Healthy individuals | Probiotic, NR                            | 12 weeks    | Probiotic versus no probiotic interventions                     | 2 | RCT             | 40/76    | Random | MD        | 0.15 (-0.30 to 0.60)       | 0      | NR                              |
| Cognitive function           | Upadhyay, R.P. 2020 <sup>[35]</sup> | Preterm infants     | Probiotic/prebiotic, no uniform standard | 28.7-47.9 d | Probiotic/prebiotic versus no probiotic/prebiotic interventions | 4 | RCT             | 700/1388 | NR     | MD        | 0.20 (-1.42 to 1.83)       | 0      | No significant publication bias |
| Risk of cognitive impairment | Upadhyay, R.P. 2020 <sup>[35]</sup> | Preterm infants     | Probiotic/prebiotic, no uniform standard | 28.7-47.9 d | Probiotic/prebiotic versus no probiotic/prebiotic interventions | 4 | RCT             | 700/1388 | NR     | RR        | 0.98 (0.75 to 1.27)        | 0      | No significant publication bias |
| Attention / Vigilance        | Marx, W. 2020 <sup>[4]</sup>        | No restrictions     | Probiotic, NR                            | NR          | Probiotic versus placebo                                        | 6 | RCT/ Cross-over | NR       | Random | Hedges' g | 0.068 (-0.120 to 0.256)    | 0      | NR                              |
| Attention / Vigilance        | Marx, W. 2020 <sup>[4]</sup>        | No restrictions     | Prebiotic, NR                            | NR          | Prebiotic versus placebo                                        | 2 | RCT             | NR       | Random | Hedges' g | -0.007 (-0.208, 0.194)     | 0      | NR                              |
| Working Memory               | Marx, W. 2020 <sup>[4]</sup>        | No restrictions     | Probiotic, NR                            | NR          | Probiotic versus placebo                                        | 4 | RCT             | NR       | Random | Hedges' g | -0.036 (-0.260 to 0.188)   | 0      | NR                              |
| Working Memory               | Marx, W. 2020 <sup>[4]</sup>        | No restrictions     | Prebiotic, NR                            | NR          | Prebiotic versus placebo                                        | 3 | RCT             | NR       | Random | Hedges' g | 0.198 (-0.134 to 0.530)    | 0      | NR                              |
| Memory - Accuracy            | Marx, W. 2020 <sup>[4]</sup>        | No restrictions     | Probiotic, NR                            | NR          | Probiotic versus placebo                                        | 4 | RCT             | NR       | Random | Hedges' g | 0.191 (-0.025 to 0.66.334) | 66.334 | NR                              |

|                      |                              |                                              |                                                  |                   |                                                                  |   |                 |        |        |           |                          |        |    |
|----------------------|------------------------------|----------------------------------------------|--------------------------------------------------|-------------------|------------------------------------------------------------------|---|-----------------|--------|--------|-----------|--------------------------|--------|----|
|                      |                              |                                              |                                                  |                   |                                                                  |   |                 |        |        | g         | 0.406)                   |        |    |
| Memory - Accuracy    | Marx, W. 2020 <sup>[4]</sup> | No restrictions                              | Prebiotic, NR                                    | NR                | Prebiotic versus placebo                                         | 3 | RCT             | NR     | Random | Hedges' g | -0.045 (-0.288 to 0.197) | 26.195 | NR |
| Memory Efficiency    | Marx, W. 2020 <sup>[4]</sup> | No restrictions                              | Probiotic, NR                                    | NR                | Probiotic versus placebo                                         | 2 | RCT             | NR     | Random | Hedges' g | 0.168 (-0.099 to 0.435)  | 0      | NR |
| Memory Efficiency    | Marx, W. 2020 <sup>[4]</sup> | No restrictions                              | Prebiotic, NR                                    | NR                | Prebiotic versus placebo                                         | 2 | RCT             | NR     | Random | Hedges' g | -0.100 (-0.301 to 0.101) | 0      | NR |
| Psychomotor Speed    | Marx, W. 2020 <sup>[4]</sup> | No restrictions                              | Probiotic, NR                                    | NR                | Probiotic versus placebo                                         | 7 | RCT/ Cross-over | NR     | Random | Hedges' g | 0.084 (-0.097 to 0.265)  | 0      | NR |
| Psychomotor Speed    | Marx, W. 2020 <sup>[4]</sup> | No restrictions                              | Prebiotic, NR                                    | NR                | Prebiotic versus placebo                                         | 2 | RCT             | NR     | Random | Hedges' g | -0.003 (-0.204 to 0.198) | 0      | NR |
| Executive Function   | Marx, W. 2020 <sup>[4]</sup> | No restrictions                              | Probiotic, NR                                    | NR                | Probiotic versus placebo                                         | 5 | RCT/ Cross-over | NR     | Random | Hedges' g | 0.189 (-0.129 to 0.507)  | 49.737 | NR |
| Instant Memory Score | Liu, C. 2022 <sup>[14]</sup> | Individuals diagnosed with Alzheimer disease | Probiotic/probiotic combined with other drug, NR | 8 weeks-12 months | Probiotic/probiotic combined with other drug versus nonprobiotic | 2 | RCT             | 49/98  | Fixed  | MD        | 3.24 (3.09 to 3.40)      | 93     | NR |
| RBANS                | Ruiz-Gonzalez, C.            | Patients with mild cognitive                 | Bifidobacterium breve A1                         | 12-16 weeks       | Probiotic versus other                                           | 2 | RCT             | 99/196 | Random | MD        | -6.02 (-16.68 to         | 99     | NR |

|                                          |                                   |                                                                                                   |                                                          |                  |                          |    |                           |           |        |      |                        |      |                                 |
|------------------------------------------|-----------------------------------|---------------------------------------------------------------------------------------------------|----------------------------------------------------------|------------------|--------------------------|----|---------------------------|-----------|--------|------|------------------------|------|---------------------------------|
|                                          | 2021 <sup>[15]</sup>              | impairment                                                                                        | Capsules, 2*10 <sup>10</sup> CFU                         |                  | interventions            |    |                           |           |        |      | 4.64)                  |      |                                 |
| Depressive symptoms                      |                                   |                                                                                                   |                                                          |                  |                          |    |                           |           |        |      |                        |      |                                 |
| Depressive symptoms related scores       | Goh, K.K. 2019 <sup>[5]</sup>     | General population or clinical population                                                         | Probiotic, 3*10 <sup>3</sup> -2*10 <sup>10</sup> CFU/d   | 4 weeks-6 months | Probiotic versus placebo | 19 | RCT                       | 1030/1901 | Random | SM D | −0.31 (−0.56 to −0.07) | 82   | No significant publication bias |
| Depressive symptomatology related scores | Chao, L. 2020 <sup>[10]</sup>     | Participants (age ≥16 years)who had no medication history within the 3 months or during the study | Probiotic, 1*10 <sup>9</sup> -1.8*10 <sup>10</sup> CFU/g | 8-24 weeks       | Probiotic versus placebo | 7  | RCT                       | 204/404   | Random | SM D | -0.48 (-0.71 to -0.26) | 21   | No significant publication bias |
| Depressive symptomatology related scores | Liu, R.T. 2019 <sup>[23]</sup>    | Medical and/or community population                                                               | Probiotic, NR                                            | 4-45 weeks       | Probiotic versus placebo | 23 | Controlled clinical trial | NR/2418   | Random | SM D | -0.24 (-0.36 to -0.12) | 48.2 | 0.08                            |
| Depressive symptomatology related scores | Zagórska, A. 2020 <sup>[27]</sup> | Healthy volunteers and people suffering from psychiatric disorders                                | Probiotic, no uniform standard                           | 4-24 weeks       | Probiotic versus placebo | 16 | RCT                       | NR/1774   | Random | SM D | -0.35 (-0.59 to -0.12) | 79   | No significant publication bias |
| Depressive symptomatology                | Le Morvan de                      | Adults, either                                                                                    | Probiotic,                                               | 4-24 weeks       | Probiotic versus         | 15 | RCT                       | 551/1092  | Rando  | SM   | -0.37                  | 48   | NR                              |

|                                          |                                     |                                                                    |                                                        |               |                                                                   |    |     |           |        |      |                           |       |                                 |
|------------------------------------------|-------------------------------------|--------------------------------------------------------------------|--------------------------------------------------------|---------------|-------------------------------------------------------------------|----|-----|-----------|--------|------|---------------------------|-------|---------------------------------|
| related scores                           | Sequeira, C. 2022 <sup>[28]</sup>   | healthy or with a specified functional CNS or psychiatric disorder | 6*10 <sup>6</sup> -3*10 <sup>10</sup> CFU/d            |               | placebo                                                           |    |     |           | m      | D    | (-0.55 to -0.20)          |       |                                 |
| Depressive symptomatology related scores | Zhu, H. Y. 2022 <sup>[41]</sup>     | Adults                                                             | Probiotic, 8*10 <sup>7</sup> -5*10 <sup>10</sup> CFU/d | 4-20 weeks    | Probiotic versus placebo                                          | 19 | RCT | 675/1345  | Random | SM D | 0.19 (0.01 to 0.37)       | 59.67 | 0.688                           |
| Depressive symptomatology related scores | Misera,A. 2021 <sup>[42]</sup>      | Clinical diagnosis of MDD                                          | Probiotic, 2*10 <sup>8</sup> -2*10 <sup>10</sup> CFU   | 28 d-2 months | Probiotic versus placebo                                          | 6  | RCT | 150/306   | Random | SM D | -0.292(-0.577 to -0.007)  | 45.63 | 0.32                            |
| Depressive symptomatology related scores | Nikolova, V.L. 2021 <sup>[43]</sup> | Patients with depression                                           | Probiotic, no uniform standard                         | 6-8 weeks     | Probiotic versus placebo                                          | 7  | RCT | 202/404   | Random | SM D | 0.58 (0.19 to 0.97)       | 73    | NR                              |
| Depressive symptomatology related scores | Sanada, K. 2020 <sup>[44]</sup>     | Patients with depression                                           | Probiotic /synbiotic, NR                               | 6-10 weeks    | Probiotic /synbiotic versus no probiotic /synbiotic interventions | 5  | RCT | 128/254   | NR     | SM D | -1.618 (-2.732 to -0.505) | 93.25 | NR                              |
| Depressive symptomatology related scores | Hofmeister, M. 2021 <sup>[45]</sup> | Populations without depression                                     | Probiotic, NR                                          | 4-52 weeks    | Probiotic versus placebo                                          | 35 | RCT | 1569/2988 | Random | SM D | 0.31 (0.15 to 0.46)       | 74.4  | No significant publication bias |
| Depressive symptomatology related scores | Hofmeister, M. 2021 <sup>[45]</sup> | Populations with depression                                        | Probiotic, NR                                          | 6-12.9 weeks  | Probiotic versus placebo                                          | 9  | RCT | 273/544   | Random | SM D | 0.78 (0.19 to 1.37)       | 89.9  | No significant publication bias |

|                                          |                                     |                                                       |                                                       |             |                            |   |     |         |        |      |                        |      |                                 |
|------------------------------------------|-------------------------------------|-------------------------------------------------------|-------------------------------------------------------|-------------|----------------------------|---|-----|---------|--------|------|------------------------|------|---------------------------------|
| Depressive symptomatology related scores | Hofmeister, M. 2021 <sup>[45]</sup> | Populations with depression                           | Prebiotic, NR                                         | 8 weeks     | Prebiotic versus placebo   | 3 | RCT | 92/184  | Random | SM D | 0.39 (0.04 to 0.73)    | 26.6 | NR                              |
| Depressive symptomatology related scores | Hofmeister, M. 2021 <sup>[45]</sup> | Populations without depression                        | Synbiotic, NR                                         | 6-24 weeks  | Synbiotic versus placebo   | 6 | RCT | 151/307 | Random | SM D | 0.68 (0.36 to 1.00)    | 44.0 | No significant publication bias |
| Depressive symptomatology related scores | Huang, R. 2016 <sup>[46]</sup>      | Healthy or depressed population                       | Probiotic, $3 \times 10^3$ - $2 \times 10^{10}$ CFU/g | 4-20 weeks  | Probiotic versus placebo   | 5 | RCT | 183/365 | Fixed  | SM D | -0.30 (-0.51 to -0.09) | 0    | No significant publication bias |
| BDI total scores                         | Jiang, J. 2021 <sup>[7]</sup>       | Patients with multiple sclerosis                      | Probiotic, $2 \times 10^9$ - $1 \times 10^{10}$ CFU/g | 6-16 weeks  | Probiotic versus placebo   | 3 | RCT | 86/173  | Random | SM D | -1.58 (-3.03 to -0.12) | 94   | NR                              |
| BDI total scores                         | Mirashrafi, S. 2021 <sup>[17]</sup> | Relapsing-remitting multiple sclerosis patients       | Probiotic, $2 \times 10^9$ - $4 \times 10^9$ CFU/d    | 12-24 weeks | Probiotic versus placebo   | 3 | RCT | 86/173  | Random | WM D | -3.22 (-4.38 to -2.06) | 90.6 | 0.123                           |
| BDI total scores                         | El Dib, R. 2021 <sup>[40]</sup>     | Patients with depression and/or anxiety and/or stress | Probiotic, NR                                         | 8 weeks     | Probiotic versus placebo   | 3 | RCT | 129/256 | Random | MD   | -3.20 (-5.91 to -0.49) | 21   | No significant publication bias |
| HAMD total scores                        | Amirani, E. 2020 <sup>[9]</sup>     | Patients with neurological or                         | Probiotic, 60-1000mg/d or                             | 6-12 weeks  | Probiotic/synbiotic versus | 4 | RCT | 90/180  | Random | WM D | -9.60 (-10.08 to -     | 99.7 | NR                              |

|                                       |                                   |                                                                                                   |                                                                     |             |                                      |    |     |          |        |    |                       |       |                                 |  |
|---------------------------------------|-----------------------------------|---------------------------------------------------------------------------------------------------|---------------------------------------------------------------------|-------------|--------------------------------------|----|-----|----------|--------|----|-----------------------|-------|---------------------------------|--|
|                                       |                                   | psychiatric disorders                                                                             | 2*10 <sup>10</sup> CFU/d                                            |             | placebo                              |    |     |          |        |    |                       | 9.11) |                                 |  |
| Anxiety symptoms                      |                                   |                                                                                                   |                                                                     |             |                                      |    |     |          |        |    |                       |       |                                 |  |
| Anxiety symptomatology related scores | Chao, L. 2020 <sup>[10]</sup>     | Participants (age ≥16 years)who had no medication history within the 3 months or during the study | Probiotic,1*10 <sup>9</sup> -1.8*10 <sup>10</sup> CFU/g or 100 ml/d | 6-24 weeks  | Probiotic versus placebo             | 7  | RCT | 258/511  | Fixed  | MD | 0.00 (-0.41 to 0.41)  | 26    | No significant publication bias |  |
| Anxiety symptomatology related scores | Liu, B. 2018 <sup>[24]</sup>      | No restrictions                                                                                   | Probiotic, 2*10 <sup>8</sup> -3*10 <sup>10</sup> CFU/d              | 4-24 weeks  | Probiotic versus placebo             | 12 | RCT | 871/1551 | Random | MD | -0.12 (-0.28 to 0.04) | 51    | 0.139                           |  |
| Anxiety symptomatology related scores | Reis, D.J. 2018 <sup>[25]</sup>   | No restrictions                                                                                   | Probiotic, 1*10 <sup>9</sup> -1*10 <sup>11</sup> CFU                | 14 d-1 year | Probiotic versus other interventions | 14 | RCT | NR/1527  | Random | MD | -0.12 (-0.29 to 0.05) | 61.76 | 0.146                           |  |
| Anxiety symptomatology related scores | Zagórska, A. 2020 <sup>[27]</sup> | Healthy volunteers and people suffering from psychiatric disorders                                | Probiotic, no uniform standard                                      | 4-24 weeks  | Probiotic versus placebo             | 14 | RCT | NR/1830  | Random | MD | 0.08 (-0.21 to 0.38)  | 87    | No significant publication bias |  |

|                                       |                                                |                                                                                     |                                                       |             |                          |    |     |          |        |    |                       |    |                                 |
|---------------------------------------|------------------------------------------------|-------------------------------------------------------------------------------------|-------------------------------------------------------|-------------|--------------------------|----|-----|----------|--------|----|-----------------------|----|---------------------------------|
| Anxiety symptomatology related scores | Le Morvan de Sequeira, C. 2022 <sup>[28]</sup> | Adults, either healthy or with a specified functional CNS or psychiatric disorder   | Probiotic, $6 \times 10^6$ - $1 \times 10^{11}$ CFU/d | 4-24 weeks  | Probiotic versus placebo | 17 | RCT | 728/1378 | Random | MD | -0.30 (-0.60 to 0.01) | 86 | NR                              |
| STAI-6 anxiety score                  | Desai, V. 2021 <sup>[37]</sup>                 | Participants scoring above cut-off in STAI-6 anxiety scores in the perinatal period | Probiotic, $6 \times 10^9$ - $6.5 \times 10^9$ CFU/d  | 12-36 weeks | Probiotic versus placebo | 2  | RCT | 279/543  | Random | OR | 0.65 (0.23 to 1.85)   | 59 | NR                              |
| DASS(Anxiety Scale) score             | El Dib, R. 2021 <sup>[40]</sup>                | Patients with depression and/or anxiety and/or stress                               | Probiotic, NR                                         | 8 weeks     | Probiotic versus placebo | 2  | RCT | 111/221  | Random | MD | 0.49 (-4.05 to 5.02)  | 74 | No significant publication bias |
| BAI score                             | El Dib, R. 2021 <sup>[40]</sup>                | Patients with depression and/or anxiety and/or stress                               | Probiotic, NR                                         | 8 weeks     | Probiotic versus placebo | 2  | RCT | 89/181   | Random | MD | -3.21 (-6.50 to 0.08) | 0  | No significant publication bias |
| Stress symptoms                       |                                                |                                                                                     |                                                       |             |                          |    |     |          |        |    |                       |    |                                 |
| Stress symptomatology related scores  | Zagórska, A. 2020 <sup>[27]</sup>              | Healthy volunteers and people suffering from psychiatric                            | Probiotic, no uniform standard                        | 4-12 weeks  | Probiotic versus placebo | 5  | RCT | NR/605   | Random | MD | 0.03 (0.23 to 0.17)   | 25 | No significant publication bias |

|                                      |                                                |                                                                                   |                                                          |               |                                        |   |     |           |        |      |                        |    |                                 |
|--------------------------------------|------------------------------------------------|-----------------------------------------------------------------------------------|----------------------------------------------------------|---------------|----------------------------------------|---|-----|-----------|--------|------|------------------------|----|---------------------------------|
|                                      |                                                | disorders                                                                         |                                                          |               |                                        |   |     |           |        |      |                        |    |                                 |
| PSS score                            | Le Morvan de Sequeira, C. 2022 <sup>[28]</sup> | Adults, either healthy or with a specified functional CNS or psychiatric disorder | Probiotic, $1 \times 10^8$ - $1.75 \times 10^{10}$ CFU/d | 4-24 weeks    | Probiotic versus placebo               | 5 | RCT | 297/582   | Random | SM D | -0.17 (-0.33 to -0.00) | 0  | NR                              |
| Subjective stress levels             | Zhang, N. 2020 <sup>[39]</sup>                 | Healthy volunteers                                                                | Single-strain probiotic, no uniform standard             | 6-24 weeks    | Single-strain probiotic versus placebo | 4 | RCT | 614/939   | Fixed  | SM D | -0.12 (-0.26 to 0.02)  | 0  | NR                              |
| Subjective stress levels             | Zhang, N. 2020 <sup>[39]</sup>                 | Healthy volunteers                                                                | Multi-strain probiotic, no uniform standard              | 30 d-12 weeks | Multi-strain probiotic versus placebo  | 2 | RCT | 51/104    | Fixed  | SM D | -0.32 (-0.71 to 0.07)  | 55 | NR                              |
| DASS(Stress Scale) score             | El Dib, R. 2021 <sup>[40]</sup>                | Patients with depression and/or anxiety and/or stress                             | Probiotic, NR                                            | 8 weeks       | Probiotic versus placebo               | 2 | RCT | 111/221   | Random | MD   | 0.84 (-2.64 to 4.33)   | 34 | No significant publication bias |
| Mood States and Psychiatric Distress |                                                |                                                                                   |                                                          |               |                                        |   |     |           |        |      |                        |    |                                 |
| POMS score                           | Le Morvan de Sequeira, C. 2022 <sup>[28]</sup> | Adults, either healthy or with a specified functional CNS or psychiatric disorder | Probiotic, $2 \times 10^9$ - $3 \times 10^{10}$ CFU/d    | 4-20 weeks    | Probiotic versus placebo               | 4 | RCT | 2268/3486 | Random | SM D | 0.17 (0.10 to 0.24)    | 0  | NR                              |



|                                       |                                                |                                                                                   |                                                          |             |                          |   |     |         |            |      |                            |    |                                 |
|---------------------------------------|------------------------------------------------|-----------------------------------------------------------------------------------|----------------------------------------------------------|-------------|--------------------------|---|-----|---------|------------|------|----------------------------|----|---------------------------------|
| Mood symptoms                         | Ng, Q.X. 2018 <sup>[11]</sup>                  | Individuals with mild-moderate depressive symptoms                                | Probiotic, 2* 10 <sup>9</sup> -1*10 <sup>10</sup> CFU/g  | 8-10 weeks  | Probiotic versus placebo | 3 | RCT | NR/163  | Randomized | SM D | -0.684 (-1.296 to -0.0712) | NR | 0.5496                          |
| Psychiatric distress symptom outcomes | Le Morvan de Sequeira, C. 2022 <sup>[28]</sup> | Adults, either healthy or with a specified functional CNS or psychiatric disorder | Probiotic, 5*10 <sup>8</sup> -1.5*10 <sup>10</sup> CFU/d | 4-24 weeks  | Probiotic versus placebo | 8 | RCT | 360/680 | Random     | SM D | -0.33 (-0.53 to -0.13)     | 36 | NR                              |
| Schizophrenic symptoms                |                                                |                                                                                   |                                                          |             |                          |   |     |         |            |      |                            |    |                                 |
| Total PANSS score                     | Ng, Q.X. 2019 <sup>[26]</sup>                  | Patients with at least moderately severe psychotic symptoms, aged 18–65 years     | Probiotic, NR                                            | 14 weeks    | Probiotic versus placebo | 3 | RCT | NR/172  | Fixed      | SM D | -0.0884 (-0.380 to 0.204)  | 0  | NR                              |
| Total PANSS score                     | Zagórska, A. 2020 <sup>[27]</sup>              | Healthy volunteers and people suffering from psychiatric disorders                | Probiotic, no uniform standard                           | 12-14 weeks | Probiotic versus placebo | 4 | RCT | NR/255  | Random     | SM D | -0.16 (-0.43 to 0.12)      | 13 | No significant publication bias |

| Overall mental health              |                                        |                                                                    |                                                       |             |                          |   |     |         |        |      |                        |     |       |
|------------------------------------|----------------------------------------|--------------------------------------------------------------------|-------------------------------------------------------|-------------|--------------------------|---|-----|---------|--------|------|------------------------|-----|-------|
| GHQ scores                         | Jiang, J.<br>2021 <sup>[7]</sup>       | Patients with multiple sclerosis                                   | Probiotic, $2 \times 10^9$ - $1 \times 10^{10}$ CFU/g | 6-16 weeks  | Probiotic versus placebo | 3 | RCT | 86/173  | Fixed  | SM D | -0.71 (-1.02 to -0.40) | 0   | NR    |
| GHQ scores                         | Mirashrafi, S.<br>2021 <sup>[17]</sup> | Relapsing-remitting multiple sclerosis patients                    | Probiotic, $2 \times 10^9$ - $4 \times 10^9$ CFU/d    | 12-24 weeks | Probiotic versus placebo | 3 | RCT | 86/173  | Random | WM D | -4.37 (-6.43 to -2.31) | 0   | 0.111 |
| Subclinical psychological symptoms | McKean, J.<br>2017 <sup>[38]</sup>     | Healthy volunteers and people suffering from psychiatric disorders | Probiotic, no uniform standard                        | 21-56 d     | Probiotic versus placebo | 7 | RCT | 394/785 | Random | SM D | 0.34 (0.07 to 0.61)    | 67  | NR    |
| Neurological function              |                                        |                                                                    |                                                       |             |                          |   |     |         |        |      |                        |     |       |
| EDSS score                         | Jiang, J.<br>2021 <sup>[7]</sup>       | Patients with multiple sclerosis                                   | Probiotic, $2 \times 10^9$ - $1 \times 10^{10}$ CFU/g | 6-16 weeks  | Probiotic versus placebo | 3 | RCT | 86/173  | Random | SM D | -1.22 (-2.40 to -0.03) | 92  | NR    |
| EDSS score                         | Mirashrafi, S.<br>2021 <sup>[17]</sup> | Relapsing-remitting multiple sclerosis patients                    | Probiotic, $2 \times 10^9$ - $4 \times 10^9$ CFU/d    | 12-24 weeks | Probiotic versus placebo | 3 | RCT | 86/173  | Random | WM D | -0.43 (-0.65 to -0.20) | 7.2 | 0.934 |

|                                    |                                        |                                                                    |                                                                                   |             |                                                                                                                  |    |     |          |             |         |                             |          |                                       |
|------------------------------------|----------------------------------------|--------------------------------------------------------------------|-----------------------------------------------------------------------------------|-------------|------------------------------------------------------------------------------------------------------------------|----|-----|----------|-------------|---------|-----------------------------|----------|---------------------------------------|
| BDNF                               |                                        |                                                                    |                                                                                   |             |                                                                                                                  |    |     |          |             |         |                             |          |                                       |
| BDNF                               | Foshati, S.<br>2022 <sup>[29]</sup>    | Healthy or<br>unhealthy<br>adults aged 18<br>years old or<br>above | Probiotic/syn-<br>biotic,<br>0.2*10 <sup>9</sup> -<br>10*10 <sup>9</sup><br>CFU/d | 42-180 d    | Probiotic/synbio-<br>tic versus<br>placebo                                                                       | 10 | RCT | 387/713  | Rando-<br>m | WM<br>D | 0.20<br>(0.06 to<br>0.34)   | 86.<br>6 | NR                                    |
| Other neuropsychiatric outcomes    |                                        |                                                                    |                                                                                   |             |                                                                                                                  |    |     |          |             |         |                             |          |                                       |
| NIHSS score                        | Zhong, D.-Y.<br>2021 <sup>[30]</sup>   | Patients with<br>stroke                                            | Probiotic,<br>NR                                                                  | 14-21 d     | Probiotics<br>combined with<br>EN and life<br>support<br>treatment versus<br>EN and life<br>support<br>treatment | 2  | RCT | 105/210  | Rando-<br>m | MD      | -1.11<br>(-7.92 to<br>5.70) | 93       | NR                                    |
| Frequency of migraine<br>headaches | Parohan, M.<br>2022 <sup>[31]</sup>    | Adult patients<br>(≥18 years old)                                  | Probiotic,<br>4*10 <sup>9</sup> -5*10 <sup>9</sup><br>CFU/d                       | 8-14 weeks  | Probiotic versus<br>placebo/current<br>preventive drug                                                           | 3  | RCT | 94/179   | Rando-<br>m | WM<br>D | -2.54<br>(-5.31 to<br>0.22) | 98.<br>1 | 0.249                                 |
| Severity of migraine<br>headaches  | Parohan, M.<br>2022 <sup>[31]</sup>    | Adult patients<br>(≥18 years old)                                  | Probiotic,<br>4*10 <sup>9</sup> -5*10 <sup>9</sup><br>CFU/d                       | 8-14 weeks  | Probiotic versus<br>placebo/current<br>preventive drug                                                           | 3  | RCT | 94/179   | Rando-<br>m | WM<br>D | -1.23<br>(-3.37 to<br>0.92) | 98.<br>5 | 0.199                                 |
| Risk of NDI                        | Upadhyay,<br>R.P. 2020 <sup>[35]</sup> | Preterm infants                                                    | Probiotic/pre-<br>biotic, no<br>uniform<br>standard                               | 28.7-47.9 d | Probiotic/prebiot-<br>ic versus no<br>probiotic/prebiot-<br>ic interventions                                     | 5  | RCT | 866/1637 | NR          | RR      | 0.90<br>(0.75 to<br>1.09)   | 9.9      | No significant<br>publication<br>bias |
| Risk of cerebral palsy             | Upadhyay,                              | Preterm infants                                                    | Probiotic/pre                                                                     | 28.7-47.9 d | Probiotic/prebiot                                                                                                | 4  | RCT | 700/1388 | NR          | RR      | 1.33 (0.84                  | 0        | No significant                        |

|                          |                                |                         |                                                                    |                     |                                                |   |     |         |        |      |                         |    |                  |
|--------------------------|--------------------------------|-------------------------|--------------------------------------------------------------------|---------------------|------------------------------------------------|---|-----|---------|--------|------|-------------------------|----|------------------|
|                          | R.P. 2020 <sup>[35]</sup>      |                         | biotic, no uniform standard                                        |                     | ic versus no probiotic/prebiotic interventions |   |     |         |        |      | to 2.11)                |    | publication bias |
| PSQI score               | Irwin, C. 2020 <sup>[36]</sup> | Adults >18 years of age | Probiotic/paraprobiotic, 1*10 <sup>9</sup> -9*10 <sup>11</sup> CFU | 3-24 weeks          | Probiotic/paraprobiotic versus placebo         | 8 | RCT | 181/356 | Random | MD   | 0.780 (0.395 to 1.166)  | 0  | NR               |
| Subjective sleep ratings | Irwin, C. 2020 <sup>[36]</sup> | Adults >18 years of age | Probiotic/paraprobiotic, 1*10 <sup>9</sup> -9*10 <sup>11</sup> CFU | 3-24 weeks          | Probiotic/paraprobiotic versus placebo         | 5 | RCT | 135/267 | Random | SM D | 0.081 (-0.135 to 0.297) | 36 | NR               |
| Sleep efficiency         | Irwin, C. 2020 <sup>[36]</sup> | Adults >18 years of age | Probiotic/paraprobiotic, NR                                        | 3-11 weeks          | Probiotic/paraprobiotic versus placebo         | 3 | RCT | 137/453 | Random | MD   | 0.019 (-1.207 to 1.244) | 0  | NR               |
| Sleep latency            | Irwin, C. 2020 <sup>[36]</sup> | Adults >18 years of age | Probiotic/paraprobiotic, NR                                        | 3-11 weeks          | Probiotic/paraprobiotic versus placebo         | 4 | RCT | 151/467 | Random | MD   | 0.693 (-1.364 to 2.750) | 0  | NR               |
| Severity of ASD symptoms | Song, W. 2022 <sup>[47]</sup>  | Patients with ASD       | Probiotic/prebiotic, NR                                            | 4 weeks to 6 months | Probiotic/prebiotic versus placebo             | 3 | RCT | 74/144  | Fixed  | SM D | -0.23 (-0.56 to 0.11)   | 0  | NR               |

MA meta-analysis, CI confidence interval, OR odds ratios, RR relative risks, SMD standardized mean differences, MD mean differences, WMD weighted mean difference, d day, CFU Colony-Forming Unit, RCT randomized controlled trial, MMSE Mini-Mental State Examination, MHE minimal hepatic encephalopathy, OHE overt hepatic encephalopathy, HE hepatic encephalopathy, SHE subclinical hepatic encephalopathy, BDI Beck Depression Inventory, BAI Beck Anxiety Inventory, GHQ general health questionnaire, HAMD Hamilton Depression Rating Scale, RBANS Repeatable Battery for the Assessment of Neurophychological Status, TYM Test Your Memory, EDSS Expanded Disability Status Scale, SIP sickness impact profile, PANSS Positive and Negative Syndrome Scale, POMS Profile of Mood States, PSS Perceived Stress scale, NIHSS national institutes of health stroke scale, NDI neurodevelopment impairment, PSQI Pittsburgh Sleep Quality Index, STAI-6 State-trait anxiety inventory-6, DASS Depression Anxiety Stress Scale, MDD Major Depressive Disorder, ASD autism spectrum disorder, CNS central nervous system, BDNF brain-derived neurotrophic factor, EN Enteral nutrition, NR not reported.

## References

- [1] Luo M, Li L, Lu C-Z, Cao W-K (2011) Clinical efficacy and safety of lactulose for minimal hepatic encephalopathy: a meta-analysis. *Eur J Gastroenterol Hepatol* 23:1250–7. <https://doi.org/10.1097/MEG.0b013e32834d1938>
- [2] Zucker DM, Redulla R (2019) Lactulose Management of Minimal Hepatic Encephalopathy: A Systematic Review. *Gastroenterol Nurs* 42:84–94. <https://doi.org/10.1097/SGA.0000000000000429>
- [3] Meng HYH, Mak CCH, Mak WY, et al (2022) Probiotic supplementation demonstrates therapeutic potential in treating gut dysbiosis and improving neurocognitive function in age-related dementia. *Eur J Nutr* 61:1701–1734. <https://doi.org/10.1007/s00394-021-02760-4>
- [4] Marx W, Scholey A, Firth J, et al. (2020). Prebiotics, probiotics, fermented foods and cognitive outcomes: A meta-analysis of randomized controlled trials. *Neuroscience and biobehavioral reviews* 118, 472–484. <https://doi.org/10.1016/j.neubiorev.2020.07.036>
- [5] Goh KK, Liu Y-W, Kuo P-H, et al (2019) Effect of probiotics on depressive symptoms: A meta-analysis of human studies. *Psychiatry Res* 282:112568. <https://doi.org/10.1016/j.psychres.2019.112568>
- [6] Viramontes Hörner, D., Avery, A., & Stow, R. (2017). The Effects of Probiotics and Symbiotics on Risk Factors for Hepatic Encephalopathy: A Systematic Review. *Journal of clinical gastroenterology* 51(4), 312–323. <https://doi.org/10.1097/MCG.0000000000000789>
- [7] Jiang J, Chu C, Wu C, et al (2021) Efficacy of probiotics in multiple sclerosis: a systematic review of preclinical trials and meta-analysis of randomized controlled trials. *Food Funct* 12:2354–2377. <https://doi.org/10.1039/d0fo03203d>
- [8] Cao Q, Yu C-B, Yang S-G, et al (2018) Effect of probiotic treatment on cirrhotic patients with minimal hepatic encephalopathy: A meta-analysis. *Hepatobiliary Pancreat Dis Int* 17:9–16. <https://doi.org/10.1016/j.hbpd.2018.01.005>
- [9] Amirani E, Milajerdi A, Mirzaei H, et al (2020) The effects of probiotic supplementation on mental health, biomarkers of inflammation and oxidative stress in patients with psychiatric disorders: A systematic review and meta-analysis of randomized controlled trials. *Complement Ther Med* 49:102361. <https://doi.org/10.1016/j.ctim.2020.102361>
- [10] Chao L, Liu C, Sutthawongwadee S, et al (2020) Effects of Probiotics on Depressive or Anxiety Variables in Healthy Participants Under Stress Conditions or With a Depressive or Anxiety Diagnosis: A Meta-Analysis of Randomized Controlled Trials. *Front Neurol* 11:421. <https://doi.org/10.3389/fneur.2020.00421>
- [11] Ng QX, Peters C, Ho CYX, et al (2018) A meta-analysis of the use of probiotics to alleviate depressive symptoms. *J Affect Disord* 228:13–19. <https://doi.org/10.1016/j.jad.2017.11.063>
- [12] Zhu G, Zhao J, Zhang H, et al (2021) Probiotics for Mild Cognitive Impairment and Alzheimer's Disease: A Systematic Review and Meta-Analysis. *Foods* 10:1672. <https://doi.org/10.3390/foods10071672>
- [13] Li X, Lv C, Song J, Li J (2021) Effect of Probiotic Supplementation on Cognitive Function and Metabolic Status in Mild Cognitive Impairment and Alzheimer's Disease: A Meta-Analysis.

Front Nutr 8:757673. <https://doi.org/10.3389/fnut.2021.757673>

- [14] Liu C, Guo X, Chang X (2022) Intestinal Flora Balance Therapy Based on Probiotic Support Improves Cognitive Function and Symptoms in Patients with Alzheimer's Disease: A Systematic Review and Meta-analysis. *Biomed Res Int* 2022:4806163. <https://doi.org/10.1155/2022/4806163>
- [15] Ruiz-Gonzalez C, Roman P, Rueda-Ruzafa L, et al (2021) Effects of probiotics supplementation on dementia and cognitive impairment: A systematic review and meta-analysis of preclinical and clinical studies. *Prog Neuropsychopharmacol Biol Psychiatry* 108:110189. <https://doi.org/10.1016/j.pnpbp.2020.110189>
- [16] Krüger JF, Hillesheim E, Pereira ACSN, et al (2021) Probiotics for dementia: a systematic review and meta-analysis of randomized controlled trials. *Nutr Rev* 79:160–170. <https://doi.org/10.1093/nutrit/nuaa037>
- [17] Mirashrafi S, Hejazi Taghanaki SZ, Sarlak F, et al (2021) Effect of probiotics supplementation on disease progression, depression, general health, and anthropometric measurements in relapsing-remitting multiple sclerosis patients: A systematic review and meta-analysis of clinical trials. *Int J Clin Pract* 75:e14724. <https://doi.org/10.1111/ijcp.14724>
- [18] Holte K, Krag A, Gluud LL (2012) Systematic review and meta-analysis of randomized trials on probiotics for hepatic encephalopathy. *Hepatol Res* 42:1008–15. <https://doi.org/10.1111/j.1872-034X.2012.01015.x>
- [19] Xu J, Ma R, Chen L-F, et al (2014) Effects of probiotic therapy on hepatic encephalopathy in patients with liver cirrhosis: an updated meta-analysis of six randomized controlled trials. *Hepatobiliary Pancreat Dis Int* 13:354–60. [https://doi.org/10.1016/s1499-3872\(14\)60280-0](https://doi.org/10.1016/s1499-3872(14)60280-0)
- [20] Zhao L-N, Yu T, Lan S-Y, et al (2015) Probiotics can improve the clinical outcomes of hepatic encephalopathy: An update meta-analysis. *Clin Res Hepatol Gastroenterol* 39:674–82. <https://doi.org/10.1016/j.clinre.2015.03.008>
- [21] Saab S, Suraweera D, Au J, et al (2016) Probiotics are helpful in hepatic encephalopathy: a meta-analysis of randomized trials. *Liver Int* 36:986–93. <https://doi.org/10.1111/liv.13005>
- [22] Dalal R, McGee RG, Riordan SM, Webster AC (2017) Probiotics for people with hepatic encephalopathy. *Cochrane Database Syst Rev* 2:CD008716. <https://doi.org/10.1002/14651858.CD008716.pub3>
- [23] Liu RT, Walsh RFL, Sheehan AE (2019) Prebiotics and probiotics for depression and anxiety: A systematic review and meta-analysis of controlled clinical trials. *Neurosci Biobehav Rev* 102:13–23. <https://doi.org/10.1016/j.neubiorev.2019.03.023>
- [24] Liu B, He Y, Wang M, et al (2018) Efficacy of probiotics on anxiety-A meta-analysis of randomized controlled trials. *Depress Anxiety* 35:935–945. <https://doi.org/10.1002/da.22811>
- [25] Reis DJ, Ilardi SS, Punt SEW (2018) The anxiolytic effect of probiotics: A systematic review and meta-analysis of the clinical and preclinical literature. *PLoS One* 13:e0199041. <https://doi.org/10.1371/journal.pone.0199041>
- [26] Ng QX, Soh AYS, Venkatanarayanan N, et al (2019) A Systematic Review of the Effect of Probiotic Supplementation on Schizophrenia Symptoms. *Neuropsychobiology* 78:1–6. <https://doi.org/10.1159/000498862>
- [27] Zagórska A, Marcinkowska M, Jamrozik M, et al (2020) From probiotics to psychobiotics - the gut-brain axis in psychiatric disorders. *Benef Microbes* 11:717–732.

<https://doi.org/10.3920/BM2020.0063>

- [28] Le Morvan de Sequeira C, Hengstberger C, Enck P, Mack I (2022) Effect of Probiotics on Psychiatric Symptoms and Central Nervous System Functions in Human Health and Disease: A Systematic Review and Meta-Analysis. *Nutrients* 14:621. <https://doi.org/10.3390/nu14030621>
- [29] Foshati S, Akhlaghi M, Babajafari S (2022) The effect of pro-/synbiotic supplementation on the brain-derived neurotrophic factor: a systematic review and meta-analysis of randomized controlled trials. *Food Funct* 13:8754–8765. <https://doi.org/10.1039/d2fo01330d>
- [30] Zhong D-Y, Li L, Ma R-M, Deng Y-H (2021) The Effect of Probiotics in Stroke Treatment. *Evid Based Complement Alternat Med* 2021:4877311. <https://doi.org/10.1155/2021/4877311>
- [31] Parohan M, Djalali M, Sarraf P, et al (2022) Effect of probiotic supplementation on migraine prophylaxis: a systematic review and meta-analysis of randomized controlled trials. *Nutr Neurosci* 25:511–518. <https://doi.org/10.1080/1028415X.2020.1764292>
- [32] Shukla S, Shukla A, Mehboob S, Guha S (2011) Meta-analysis: the effects of gut flora modulation using prebiotics, probiotics and synbiotics on minimal hepatic encephalopathy. *Aliment Pharmacol Ther* 33:662–71. <https://doi.org/10.1111/j.1365-2036.2010.04574.x>
- [33] Den H, Dong X, Chen M, Zou Z (2020) Efficacy of probiotics on cognition, and biomarkers of inflammation and oxidative stress in adults with Alzheimer's disease or mild cognitive impairment - a meta-analysis of randomized controlled trials. *Aging (Albany NY)* 12:4010–4039. <https://doi.org/10.18632/aging.102810>
- [34] Lv T, Ye M, Luo F, et al (2021) Probiotics treatment improves cognitive impairment in patients and animals: A systematic review and meta-analysis. *Neurosci Biobehav Rev* 120:159–172. <https://doi.org/10.1016/j.neubiorev.2020.10.027>
- [35] Upadhyay RP, Taneja S, Chowdhury R, et al (2020) Effect of prebiotic and probiotic supplementation on neurodevelopment in preterm very low birth weight infants: findings from a meta-analysis. *Pediatr Res* 87:811–822. <https://doi.org/10.1038/s41390-018-0211-9>
- [36] Irwin C, McCartney D, Desbrow B, Khalesi S (2020) Effects of probiotics and paraprobiotics on subjective and objective sleep metrics: a systematic review and meta-analysis. *Eur J Clin Nutr* 74:1536–1549. <https://doi.org/10.1038/s41430-020-0656-x>
- [37] Desai V, Kozyskyj AL, Lau S, et al (2021) Effectiveness of Probiotic, Prebiotic, and Synbiotic Supplementation to Improve Perinatal Mental Health in Mothers: A Systematic Review and Meta-Analysis. *Front Psychiatry* 12:622181. <https://doi.org/10.3389/fpsy.2021.622181>
- [38] McKean J, Naug H, Nikbakht E, et al (2017) Probiotics and Subclinical Psychological Symptoms in Healthy Participants: A Systematic Review and Meta-Analysis. *J Altern Complement Med* 23:249–258. <https://doi.org/10.1089/acm.2016.0023>
- [39] Zhang N, Zhang Y, Li M, et al (2020) Efficacy of probiotics on stress in healthy volunteers: A systematic review and meta-analysis based on randomized controlled trials. *Brain Behav* 10:e01699. <https://doi.org/10.1002/brb3.1699>

- [40] El Dib R, Periyasamy AG, de Barros JL, et al (2021) Probiotics for the treatment of depression and anxiety: A systematic review and meta-analysis of randomized controlled trials. *Clin Nutr ESPEN* 45:75–90. <https://doi.org/10.1016/j.clnesp.2021.07.027>
- [41] Zhu H Y, Tian P J, Zhao J X, et al (2022) A psychobiotic approach to the treatment of depression: A systematic review and meta-analysis. *J. Funct. Foods* 91: 104999.
- [42] Misera A, Liśkiewicz P, Łoniewski I, et al (2021) Effect of Psychobiotics on Psychometric Tests and Inflammatory Markers in Major Depressive Disorder: Meta-Analysis of Randomized Controlled Trials with Meta-Regression. *Pharmaceuticals (Basel)* 14:952. <https://doi.org/10.3390/ph14100952>
- [43] Nikolova VL, Cleare AJ, Young AH, Stone JM (2021) Updated Review and Meta-Analysis of Probiotics for the Treatment of Clinical Depression: Adjunctive vs. Stand-Alone Treatment. *J Clin Med* 10:647. <https://doi.org/10.3390/jcm10040647>
- [44] Sanada K, Nakajima S, Kurokawa S, et al (2020) Gut microbiota and major depressive disorder: A systematic review and meta-analysis. *J Affect Disord* 266:1–13. <https://doi.org/10.1016/j.jad.2020.01.102>
- [45] Hofmeister M, Clement F, Patten S, et al (2021) The effect of interventions targeting gut microbiota on depressive symptoms: a systematic review and meta-analysis. *CMAJ Open* 9: E1195–E1204. <https://doi.org/10.9778/cmajo.20200283>
- [46] Huang R, Wang K, Hu J (2016) Effect of Probiotics on Depression: A Systematic Review and Meta-Analysis of Randomized Controlled Trials. *Nutrients* 8:483. <https://doi.org/10.3390/nu8080483>
- [47] Song W, Zhang M, Teng L, et al (2022) Prebiotics and probiotics for autism spectrum disorder: a systematic review and meta-analysis of controlled clinical trials. *J Med Microbiol* 71:10.1099/jmm.0.001510. <https://doi.org/10.1099/jmm.0.001510>
