# Supplementary material
Source: publisher figshare collection journal article supplement (https://brill.figshare.com/articles/dataset/_/26715736)
Supplement: Supplementary file 1 [file 1]

## Sheet: Table S3 AMSTAR
If there is no or only one non-critical item is considered as N, the meta-analysis is rated as highly reliable. If more than one non-critical item is rated as nonconformance, the analysis is considered to have medium credibility. If the analysis does not meet one key item regardless of whether it meets any non-key item, it is rated as low reliability. If more than one key item does not meet the c…
STUDY	1	2*	3	4*	5	6	7*	8	9*	10	11*	12	13*	14	15*	16	Overall confidence
Luo, M.2011	Y	PY	Y	PY	Y	Y	N	PY	PY	N	Y	Y	Y	Y	Y	Y	LOW
Zucker, D.M.2019	Y	PY	Y	Y	Y	Y	N	PY	Y	N	Y	N	N	N	N	N	VERY LOW
Meng, H.Y.H.2022	Y	PY	Y	PY	Y	Y	N	Y	Y	N	Y	N	Y	Y	Y	Y	LOW
Marx, W.2020	Y	Y	Y	PY	Y	Y	N	PY	Y	N	Y	N	N	N	N	N	VERY LOW
Goh, K.K.2019	Y	Y	Y	PY	Y	Y	N	Y	Y	N	Y	Y	Y	Y	Y	Y	LOW
Viramontes Hörner, D.2017	Y	PY	Y	PY	Y	Y	N	Y	Y	N	Y	N	N	Y	N	N	VERY LOW
Jiang, J.2021	Y	Y	Y	Y	Y	Y	N	Y	Y	N	Y	Y	N	Y	N	Y	VERY LOW
Cao, Q.2018	Y	PY	Y	PY	Y	Y	N	Y	Y	N	Y	N	N	N	N	Y	VERY LOW
Amirani, E.2020	Y	PY	Y	Y	Y	Y	N	Y	Y	N	Y	N	N	N	N	Y	VERY LOW
Chao, L.2020	Y	PY	Y	PY	Y	Y	N	Y	Y	N	Y	N	Y	Y	Y	Y	LOW
Ng, Q.X. 2018	Y	PY	Y	PY	Y	Y	N	Y	Y	N	Y	Y	N	N	Y	N	VERY LOW
Zhu, G.2021	Y	Y	Y	Y	Y	Y	N	Y	Y	N	Y	Y	N	N	N	Y	VERY LOW
Li, X.2021	Y	PY	Y	Y	Y	Y	N	Y	Y	N	Y	Y	Y	N	Y	Y	LOW
Liu, C.2022	Y	PY	Y	PY	Y	Y	N	PY	Y	N	Y	N	N	Y	N	Y	VERY LOW
Ruiz-Gonzalez, C.2021	Y	PY	Y	Y	Y	Y	N	Y	Y	N	Y	N	N	N	Y	N	VERY LOW
Krüger, J.F.2021	Y	Y	Y	Y	Y	Y	N	Y	Y	N	Y	N	Y	Y	N	Y	VERY LOW
Mirashrafi, S.2021	Y	Y	Y	Y	Y	Y	N	PY	Y	N	Y	N	N	N	Y	N	VERY LOW
Holte, K.2012	Y	PY	Y	Y	Y	Y	N	Y	Y	N	Y	N	Y	Y	N	N	VERY LOW
Xu, J.2014	Y	PY	Y	PY	Y	Y	N	Y	Y	N	Y	Y	N	Y	N	Y	VERY LOW
Zhao, L.-N.2015	Y	PY	Y	PY	Y	Y	N	PY	Y	N	Y	Y	N	Y	Y	N	VERY LOW
Saab, S.2016	Y	PY	Y	Y	Y	Y	N	Y	N	N	Y	N	N	Y	N	Y	VERY LOW
Dalal, R.2017	Y	Y	Y	Y	Y	Y	Y	Y	Y	Y	Y	Y	Y	Y	N	Y	LOW
Liu, R.T.2019	Y	PY	Y	PY	Y	Y	N	Y	Y	N	Y	N	N	Y	Y	N	VERY LOW
Liu, B.2018	Y	PY	Y	PY	Y	Y	N	Y	Y	N	Y	Y	Y	Y	Y	Y	LOW
Reis, D.J.2018	Y	Y	Y	PY	Y	Y	N	Y	Y	N	Y	Y	Y	Y	Y	N	LOW
Ng, Q.X.2019	Y	PY	Y	Y	Y	Y	N	PY	Y	N	Y	Y	N	N	N	N	VERY LOW
Zagórska, A.2020	Y	PY	Y	PY	Y	Y	N	PY	N	N	Y	N	N	N	Y	Y	VERY LOW
Le Morvan de Sequeira, C.2022	Y	Y	Y	PY	Y	Y	N	Y	Y	N	Y	N	N	Y	N	Y	VERY LOW
Foshati, S.2022	Y	PY	Y	Y	Y	Y	N	Y	Y	N	Y	Y	Y	N	Y	Y	LOW
Zhong, D.-Y.2021	Y	PY	Y	PY	Y	Y	N	PY	Y	N	Y	N	Y	N	Y	Y	LOW
Parohan, M.2022	Y	PY	Y	Y	Y	Y	N	PY	Y	N	Y	Y	N	Y	Y	Y	VERY LOW
Shukla, S.2011	Y	PY	Y	PY	Y	Y	N	PY	Y	N	Y	Y	Y	Y	Y	N	LOW
Den, H.2020	Y	PY	Y	Y	Y	Y	N	Y	Y	N	Y	Y	N	N	Y	Y	VERY LOW
Lv, T.2021	Y	PY	Y	PY	Y	Y	N	PY	Y	N	Y	N	N	Y	N	Y	VERY LOW
Upadhyay, R.P.2020	Y	PY	Y	Y	Y	Y	N	Y	Y	N	Y	Y	Y	Y	Y	Y	LOW
Irwin, C.2020	Y	Y	Y	Y	Y	Y	N	Y	Y	N	Y	Y	Y	Y	N	Y	VERY LOW
Desai, V.2021	Y	Y	Y	Y	Y	Y	N	Y	Y	N	Y	Y	Y	Y	N	Y	VERY LOW
McKean, J.2017	Y	PY	Y	PY	Y	Y	N	Y	N	N	Y	N	N	Y	N	Y	VERY LOW
Zhang, N.2020	Y	Y	Y	PY	Y	Y	N	Y	Y	N	Y	Y	Y	Y	N	Y	VERY LOW
El Dib, R.2021	Y	Y	Y	Y	Y	Y	N	PY	Y	Y	Y	N	Y	Y	Y	Y	LOW
Zhu, H. Y.2022	Y	Y	Y	PY	Y	Y	N	Y	Y	N	Y	N	N	Y	Y	Y	VERY LOW
Misera, A.2021	Y	Y	Y	Y	Y	Y	N	Y	Y	Y	Y	Y	Y	Y	Y	Y	LOW
Nikolova, V.L.2021	Y	PY	Y	PY	Y	Y	N	Y	Y	N	Y	Y	Y	Y	N	Y	VERY LOW
Sanada, K.2020	Y	PY	Y	PY	Y	Y	N	PY	Y	N	Y	Y	Y	Y	N	Y	VERY LOW
Hofmeister, M.2021	Y	Y	Y	Y	Y	Y	N	PY	Y	N	Y	N	N	Y	Y	N	VERY LOW
Huang, R.2016	Y	PY	Y	PY	Y	Y	N	Y	Y	N	Y	Y	Y	Y	Y	Y	LOW
Song, W.2022	Y	Y	Y	PY	Y	Y	N	PY	Y	N	Y	Y	Y	Y	N	Y	VERY LOW

## Sheet: Table S4 GRADE
FIRST AUTHOR + YEAR	OUTCOME	Estimate（95%CI）	No.of STUDIES	Number of intervention/observation or total participants	RCTs	Risk of Bias	Inconsistency	Indirectness	Imprecision	Publication bias	Effect of plausible residual confounding	Large magnitude of an effect	Dose-response gradient	Quality
++++ High; +++ Moderate; ++ Low; + Very low; NR not reported
Luo, M.2011	Risk of no improvement in neurophychological tests	0.52 (0.44 to 0.62)	9	228/434	9	No Serious Risk	No Serious Inconsistency	No Serious Indirectness	Serious Risk	Undetected	No	No	No	+++
	Changes in mean number of abnormal neuropsychological tests	−1.76 (−1.96 to −1.56)	4	107/203	4	No Serious Risk	No Serious Inconsistency	No Serious Indirectness	No Serious Risk	NR	No	No	No	++++
	Risk of progression to OHE	0.17 (0.06 to 0.52)	5	112/220	5	No Serious Risk	No Serious Inconsistency	No Serious Indirectness	No Serious Risk	NR	No	Yes	No	++++
Zucker, D.M.2019	Results of Psychometric testing	‐0.99 (-1.38 to -0.61)	2	63/130	2	No Serious Risk	Serious Inconsistency	No Serious Indirectness	No Serious Risk	NR	No	No	No	++
Meng, H.Y.H.2022	MMSE score	0.92 (-0.05 to 1.89)	5	161/316	4	Serious Risk	Serious Inconsistency	No Serious Indirectness	No Serious Risk	Undetected	No	No	No	++
Marx, W.2020	Global cognition	0.115 (-0.041 to 0.270)	11	285/562	11	NR	No Serious Inconsistency	No Serious Indirectness	No Serious Risk	Undetected	No	No	No	+++
	Global cognition	0.077 (-0.091 to 0.246)	5	274/324	5	NR	No Serious Inconsistency	No Serious Indirectness	No Serious Risk	Undetected	No	No	No	+++
	Attention / Vigilance	0.068 (-0.120 to 0.256)	6	NR	6	NR	No Serious Inconsistency	No Serious Indirectness	No Serious Risk	NR	No	No	No	++
	Attention / Vigilance	−0.007 (-0.208, 0.194)	2	NR	2	NR	No Serious Inconsistency	No Serious Indirectness	No Serious Risk	NR	No	No	No	++
	Working Memory	−0.036 (-0.260 to 0.188)	4	NR	4	NR	No Serious Inconsistency	No Serious Indirectness	No Serious Risk	NR	No	No	No	++
	Working Memory	0.198 (-0.134 to 0.530)	3	NR	3	NR	No Serious Inconsistency	No Serious Indirectness	No Serious Risk	NR	No	No	No	++
	Memory - Accuracy	0.191 (-0.025 to 0.406)	4	NR	4	NR	Serious Inconsistency	No Serious Indirectness	No Serious Risk	NR	No	No	No	+
	Memory - Accuracy	−0.045 (-0.288 to 0.197)	3	NR	3	NR	No Serious Inconsistency	No Serious Indirectness	No Serious Risk	NR	No	No	No	++
	Memory -Efficiency	0.168 (-0.099 to 0.435)	2	NR	2	NR	No Serious Inconsistency	No Serious Indirectness	No Serious Risk	NR	No	No	No	++
	Memory -Efficiency	−0.100 (-0.301 to 0.101)	2	NR	2	NR	No Serious Inconsistency	No Serious Indirectness	No Serious Risk	NR	No	No	No	++
	Psychomotor Speed	0.084 (-0.097 to 0.265)	7	NR	7	NR	No Serious Inconsistency	No Serious Indirectness	No Serious Risk	NR	No	No	No	++
	Psychomotor Speed	−0.003 (-0.204 to 0.198)	2	NR	2	NR	No Serious Inconsistency	No Serious Indirectness	No Serious Risk	NR	No	No	No	++
	Executive Function	0.189 (-0.129 to 0.507)	5	NR	5	NR	No Serious Inconsistency	No Serious Indirectness	No Serious Risk	NR	No	No	No	++
Goh, K.K.2019	Depressive symptoms related scores	−0.31 (−0.56 to −0.07)	19	1030/1901	19	No Serious Risk	Serious Inconsistency	No Serious Indirectness	No Serious Risk	Undetected	No	No	No	+++
Viramontes Hörner, D.2017	Reversal of MHE	1.53 (1.14 to 2.05)	9	262/570	9	Serious Risk	Serious Inconsistency	No Serious Indirectness	No Serious Risk	NR	No	No	No	+
	Development of OHE	0.62 (0.48 to 0.80)	6	303/587	6	Serious Risk	No Serious Inconsistency	No Serious Indirectness	No Serious Risk	NR	Yes	No	No	+++
Jiang, J.2021	BDI total scores	.-1.58(-3.03 to -0.12)	3	86/173	3	No Serious Risk	Serious Inconsistency	No Serious Indirectness	No Serious Risk	NR	No	No	No	++
	GHQ scores	.-0.71 (-1.02 to -0.40)	3	86/173	3	No Serious Risk	No Serious Inconsistency	No Serious Indirectness	No Serious Risk	NR	No	No	No	+++
	EDSS score	.-1.22 (-2.40 to -0.03)	3	86/173	3	No Serious Risk	Serious Inconsistency	No Serious Indirectness	No Serious Risk	NR	No	No	No	++
Cao, Q.2018	Number connection test	.-30.25 (-49.85 to -10.66)	2	54/104	2	Serious Risk	Serious Inconsistency	No Serious Indirectness	No Serious Risk	NR	No	No	No	+
	Improvement in MHE	0.18 (0.07 to 0.47)	2	26/33	2	Serious Risk	No Serious Inconsistency	No Serious Indirectness	No Serious Risk	Undetected	No	Yes	No	++++
	Development of OHE	0.22 (0.07 to 0.67)	3	4./20	3	Serious Risk	No Serious Inconsistency	No Serious Indirectness	No Serious Risk	Undetected	No	Yes	No	++++
Amirani, E.2020	HAMD total scores	.-9.60 (-10.08 to -9.11)	4	90/180	4	NR	Serious Inconsistency	No Serious Indirectness	No Serious Risk	NR	No	No	No	+
Chao, L.2020	Anxiety symptomatology related scores	0.00 (-0.41 to 0.41)	7	258/511	7	Serious Risk	No Serious Inconsistency	No Serious Indirectness	No Serious Risk	Undetected	No	No	No	+++
	Depressive symptomatology related scores	.-0.48 (-0.71 to -0.26)	7	204/404	7	Serious Risk	No Serious Inconsistency	No Serious Indirectness	No Serious Risk	Undetected	No	No	No	+++
Ng, Q.X. 2018	Mood symptoms	.-0.684 (-1.296 to -0.0712)	3	NR/163	3	No Serious Risk	NR	No Serious Indirectness	No Serious Risk	Undetected	No	No	No	+++
Zhu, G.2021	MMSE score	0.59 (-0.44 to 1.63)	4	116/230	4	No Serious Risk	Serious Inconsistency	No Serious Indirectness	No Serious Risk	NR	No	No	No	++
	Cognitive function	0.34 (-0.66 to 1.34)	4	114/234	4	No Serious Risk	Serious Inconsistency	No Serious Indirectness	No Serious Risk	Undetected	No	No	No	+++
Li, X.2021	MMSE score	1.08 (-0.34 to 2.50)	3	118/234	3	No Serious Risk	Serious Inconsistency	No Serious Indirectness	No Serious Risk	NR	No	No	No	++
Liu, C.2022	Instant Memory Score	3.24 (3.09 to 3.40)	2	49/98	2	Serious Risk	Serious Inconsistency	No Serious Indirectness	No Serious Risk	NR	No	No	No	+
Ruiz-Gonzalez, C.2021	RBANS	.-6.02 (-16.68 to 4.64)	2	99/196	2	No Serious Risk	Serious Inconsistency	No Serious Indirectness	No Serious Risk	NR	No	No	No	++
Krüger, J.F.2021	Cognitive function	0.56 (-0.06 to 1.18)	3	82/161	3	Serious Risk	Serious Inconsistency	No Serious Indirectness	No Serious Risk	NR	No	No	No	+
Mirashrafi, S.2021	BDI total scores	.-3.22 (-4.38 to -2.06)	3	86/173	3	No Serious Risk	Serious Inconsistency	No Serious Indirectness	No Serious Risk	Undetected	No	No	No	+++
	GHQ scores	.-4.37 (-6.43 to -2.31)	3	86/173	3	No Serious Risk	No Serious Inconsistency	No Serious Indirectness	No Serious Risk	Undetected	No	No	No	++++
	EDSS score	.-0.43 (-0.65 to -0.20)	3	86/173	3	No Serious Risk	No Serious Inconsistency	No Serious Indirectness	No Serious Risk	Undetected	No	No	No	++++
Holte, K.2012	Improvement in HE	1.40 (1.05 to 1.86)	6	171/333	6	Serious Risk	No Serious Inconsistency	No Serious Indirectness	No Serious Risk	NR	No	No	No	++
Xu, J.2014	Development of OHE	0.42 (0.26 to 0.70)	4	207/394	4	No Serious Risk	No Serious Inconsistency	No Serious Indirectness	No Serious Risk	NR	No	Yes	No	++++
Zhao, L.-N.2015	SIP(psychosocial dimension)	.-3.50 (-4.91 to -2.08)	2	48/95	2	No Serious Risk	No Serious Inconsistency	No Serious Indirectness	No Serious Risk	NR	No	No	No	+++
	Improvement in HE	1.52 (1.00 to 2.33)	6	229/450	6	No Serious Risk	Serious Inconsistency	No Serious Indirectness	No Serious Risk	Undetected	No	No	No	+++
Saab, S.2016	Improvement in MHE	3.91 (2.25 to 6.80)	7	174/352	7	NR	No Serious Inconsistency	No Serious Indirectness	No Serious Risk	NR	No	Yes	No	+++
	Progression to OHE	0.40 (0.26 to 0.60)	7	317/611	7	NR	No Serious Inconsistency	No Serious Indirectness	No Serious Risk	NR	No	Yes	No	+++
Dalal, R.2017	SIP(psychosocial dimension)	.-3.54 (-4.95 to -2.12)	2	48/95	2	Serious Risk	No Serious Inconsistency	No Serious Indirectness	No Serious Risk	NR	No	No	No	++
	Progression to OHE	0.29 (0.16 to 0.51)	10	299/585	10	Serious Risk	No Serious Inconsistency	No Serious Indirectness	No Serious Risk	NR	No	Yes	No	+++
Liu, R.T.2019	Depressive symptomatology related scores	.-0.24 (-0.36 to -0.12)	23	NR/2418	NR	Serious Risk	No Serious Inconsistency	No Serious Indirectness	No Serious Risk	Undetected	No	No	No	+
Liu, B.2018	Anxiety symptomatology related scores	.-0.12 (-0.28 to 0.04)	12	871/1551	12	No Serious Risk	Serious Inconsistency	No Serious Indirectness	No Serious Risk	Undetected	No	No	No	+++
Reis, D.J.2018	Anxiety symptomatology related scores	.-0.12 (-0.29 to 0.05)	14	NR/1527	14	No Serious Risk	Serious Inconsistency	No Serious Indirectness	No Serious Risk	Undetected	No	No	No	+++
Ng, Q.X.2019	Total PANSS score	.-0.0884（-0.380 to 0.204)	3	NR/172	3	No Serious Risk	No Serious Inconsistency	No Serious Indirectness	No Serious Risk	NR	No	No	No	+++
Zagórska, A.2020	Total PANSS score	.-0.16 (-0.43 to 0.12)	4	NR/255	4	NR	No Serious Inconsistency	No Serious Indirectness	No Serious Risk	Undetected	No	No	No	+++
	Anxiety symptomatology related scores	0.08 (-0.21 to 0.38)	14	NR/1830	14	NR	Serious Inconsistency	No Serious Indirectness	No Serious Risk	Undetected	No	No	No	++
	Stress symptomatology related scores	0.03 (0.23 to 0.17)	5	NR/605	5	NR	No Serious Inconsistency	No Serious Indirectness	No Serious Risk	Undetected	No	No	No	+++
	Depressive symptomatology related scores	.-0.35 (-0.59 to -0.12)	16	NR/1774	16	NR	Serious Inconsistency	No Serious Indirectness	No Serious Risk	Undetected	No	No	No	++
Le Morvan de Sequeira, C.2022	Anxiety symptomatology related scores	.-0.30 (-0.60 to 0.01)	17	728/1378	17	Serious Risk	Serious Inconsistency	No Serious Indirectness	No Serious Risk	NR	No	No	No	+
	PSS score	.-0.17 (-0.33 to -0.00)	5	297/582	5	Serious Risk	No Serious Inconsistency	No Serious Indirectness	No Serious Risk	NR	No	No	No	++
	POMS score	0.17 (0.10 to 0.24)	4	2268/3486	4	Serious Risk	No Serious Inconsistency	No Serious Indirectness	No Serious Risk	NR	No	No	No	++
	Psychiatric distress symptom outcomes	.-0.33 (-0.53 to -0.13)	8	360/680	8	Serious Risk	No Serious Inconsistency	No Serious Indirectness	No Serious Risk	NR	No	No	No	++
	Depressive symptomatology related scores	.-0.37 (-0.55 to -0.20)	15	551/1092	15	Serious Risk	No Serious Inconsistency	No Serious Indirectness	No Serious Risk	NR	No	No	No	++
Foshati, S.2022	BDNF	0.20 (0.06 to 0.34)	10	387/713	10	No Serious Risk	Serious Inconsistency	No Serious Indirectness	No Serious Risk	NR	No	No	No	++
Zhong, D.-Y.2021	NIHSS score	.-1.11 (-7.92 to 5.70)	2	105/210	2	No Serious Risk	Serious Inconsistency	No Serious Indirectness	No Serious Risk	NR	No	No	No	++
Parohan, M.2022	Frequency of migraine headaches	.-2.54 (-5.31 to 0.22)	3	94/179	3	Serious Risk	Serious Inconsistency	No Serious Indirectness	No Serious Risk	Undetected	No	No	No	++
	Severity of migraine headaches	.-1.23 (-3.37 to 0.92)	3	94/179	3	Serious Risk	Serious Inconsistency	No Serious Indirectness	No Serious Risk	Undetected	No	No	No	++
Shukla, S.2011	Risk of no improvement of MHE	0.40 (0.32 to 0.50)	9	422/698	9	No Serious Risk	No Serious Inconsistency	No Serious Indirectness	No Serious Risk	Undetected	No	Yes	No	++++
	Risk of no improvement of MHE	0.34 (0.24 to 0.47)	5	204/340	5	No Serious Risk	No Serious Inconsistency	No Serious Indirectness	No Serious Risk	Undetected	No	Yes	No	++++
Den, H.2020	Non-MMSE score	0.16 (-0.17 to 0.50)	2	NR/140	2	No Serious Risk	No Serious Inconsistency	No Serious Indirectness	No Serious Risk	Undetected	No	No	No	++++
Lv, T.2021	Global cognition	0.17 (-0.12 to 0.46)	4	93/182	4	Serious Risk	No Serious Inconsistency	No Serious Indirectness	No Serious Risk	NR	No	No	No	++
	Cognitive function	0.15 (-0.30 to 0.60)	2	40/76	2	Serious Risk	No Serious Inconsistency	No Serious Indirectness	No Serious Risk	NR	No	No	No	++
Upadhyay, R.P.2020	Cognitive function	0.20 (-1.42 to 1.83)	4	700/1388	4	No Serious Risk	No Serious Inconsistency	Serious Indirectness	Serious Risk	Undetected	No	No	No	++
	Risk of cognitive impairment	0.98 (0.75 to 1.27)	4	700/1388	4	No Serious Risk	No Serious Inconsistency	Serious Indirectness	Serious Risk	Undetected	No	No	No	++
	Risk of NDI	0.90 (0.75 to 1.09	5	866/1637	5	No Serious Risk	No Serious Inconsistency	Serious Indirectness	Serious Risk	Undetected	No	No	No	++
	Risk of Cerebral palsy	1.33 (0.84 to 2.11)	4	700/1388	4	No Serious Risk	No Serious Inconsistency	Serious Indirectness	Very Serious Risk	Undetected	No	No	No	+
Irwin, C.2020	Subjective sleep ratings	0.081 (-0.135 to 0.297)	5	135/267	5	No Serious Risk	No Serious Inconsistency	No Serious Indirectness	No Serious Risk	NR	No	No	No	+++
	Sleep efficiency	0.019 (-1.207 to 1.244)	3	137/453	3	No Serious Risk	No Serious Inconsistency	No Serious Indirectness	No Serious Risk	NR	No	No	No	+++
	Sleep latency	0.693 (-1.364 to 2.750)	4	151/467	4	No Serious Risk	No Serious Inconsistency	No Serious Indirectness	No Serious Risk	NR	No	No	No	+++
	PSQI score	0.780 (0.395 to 1.166)	8	181/356	8	No Serious Risk	No Serious Inconsistency	No Serious Indirectness	No Serious Risk	NR	No	No	No	+++
Desai, V.2021	STAI-6 anxiety score	0.65 (0.23 to 1.85)	2	279/543	2	No Serious Risk	Serious Inconsistency	No Serious Indirectness	Serious Risk	NR	No	No	No	+
McKean, J.2017	Subclinical psychological symptoms	0.34 (0.07 to 0.61)	7	394/785	7	NR	Serious Inconsistency	No Serious Indirectness	No Serious Risk	NR	No	No	No	+
Zhang, N.2020	Subjective stress levels	.-0.12 (-0.26 to 0.02)	4	614/939	4	No Serious Risk	No Serious Inconsistency	No Serious Indirectness	No Serious Risk	NR	No	No	No	+++
	Subjective stress levels	.-0.32 (-0.71 to 0.07)	2	51/104	2	No Serious Risk	Serious Inconsistency	No Serious Indirectness	No Serious Risk	NR	No	No	No	++
El Dib, R.2021	DASS(Stress Scale) score	0.84 (-2.64 to 4.33)	2	111/221	2	Serious Risk	No Serious Inconsistency	Serious Indirectness	Serious Risk	Undetected	No	No	No	+
	BDI total scores	.-3.20 (-5.91 to -0.49)	3	129/256	3	Serious Risk	No Serious Inconsistency	No Serious Indirectness	No Serious Risk	Undetected	No	No	No	+++
	DASS(Anxiety Scale) score	0.49 (-4.05 to 5.02)	2	111/221	2	Serious Risk	Serious Inconsistency	Serious Indirectness	Serious Risk	Undetected	No	No	No	+
	BAI score	.-3.21 (-6.50 to 0.08)	2	89/181	2	Serious Risk	No Serious Inconsistency	No Serious Indirectness	Serious Risk	Undetected	No	No	No	++
Zhu, H. Y.2022	Depressive symptomatology related scores	0.19 (0.01 to 0.37)	19	675/1345	19	Serious Risk	Serious Inconsistency	No Serious Indirectness	No Serious Risk	Undetected	No	No	No	++
Misera, A.2021	Depressive symptomatology related scores	.-0.292 (-0.577 to -0.007)	6	150/306	6	Serious Risk	No Serious Inconsistency	No Serious Indirectness	No Serious Risk	Undetected	No	No	No	+++
Nikolova, V.L.2021	Depressive symptomatology related scores	0.58 (0.19 to 0.97)	7	202/404	7	No Serious Risk	Serious Inconsistency	No Serious Indirectness	No Serious Risk	NR	No	No	No	++
Sanada, K.2020	Depressive symptomatology related scores	.-1.618 (-2.732 to -0.505)	5	128/254	5	Serious Risk	Serious Inconsistency	No Serious Indirectness	No Serious Risk	NR	No	No	No	+
Hofmeister, M.2021	Depressive symptomatology related scores	0.31 (0.15 to 0.46)	35	1569/2988	35	Serious Risk	Serious Inconsistency	No Serious Indirectness	No Serious Risk	Undetected	No	No	No	++
	Depressive symptomatology related scores	0.78 (0.19 to 1.37)	9	273/544	9	Serious Risk	Serious Inconsistency	No Serious Indirectness	No Serious Risk	Undetected	No	No	No	++
	Depressive symptomatology related scores	0.39 (0.04 to 0.73)	3	92/184	3	Serious Risk	No Serious Inconsistency	No Serious Indirectness	No Serious Risk	NR	No	No	No	++
	Depressive symptomatology related scores	0.68 (0.36 to 1.00)	6	151/307	6	Serious Risk	No Serious Inconsistency	No Serious Indirectness	No Serious Risk	Undetected	No	No	No	+++
Huang, R.2016	Depressive symptomatology related scores	.-0.30 (-0.51 to -0.09)	5	183/365	5	No Serious Risk	No Serious Inconsistency	No Serious Indirectness	No Serious Risk	Undetected	No	No	No	++++
Song, W.2022	Severity of ASD symptoms	.-0.23 (-0.56 to 0.11)	3	74/144	3	No Serious Risk	No Serious Inconsistency	No Serious Indirectness	No Serious Risk	NR	No	No	No	+++

## Sheet: ESM
Supplementary online material of Beneficial Microbes
DOI: https://doi.org/10.1163/18762891-bja00035
Probiotics/prebiotics/synbiotics and human neuropsychiatric outcomes: an umbrella review
Q. Du, Q. Li, C. Liu, G. Liao, J. Li, J. Yang, Q. Zhang, X. Gong and K. Li
